# Supplementary material
Source: publisher figshare collection journal article supplement (https://acs.figshare.com/ndownloader/files/4748902)
Supplement: Supplementary file 1 [file 4748902]

Supplementary Information for:

**Attenuation of wastewater-derived contaminants in an effluent-dominated river**

Lorien J. Fono, Edward P. Kolodziej and David L. Sedlak

Department of Civil and Environmental Engineering  
University of California at Berkeley  
Berkeley, CA 94720

Submitted to  
Environmental Science and Technology  
May, 2006  
Revised August, 2006

15 pages

**Table SI 1. Information about WWTPs sampled.**

| WWT<br>P | Average Flow                                   |                                                |                                                | Secondary<br>Treatment | Tertiary/Advanced Treatment                                             |
|----------|------------------------------------------------|------------------------------------------------|------------------------------------------------|------------------------|-------------------------------------------------------------------------|
|          | 03/05<br>$\text{m}^3\text{s}^{-1}(\text{mgd})$ | 07/05<br>$\text{m}^3\text{s}^{-1}(\text{mgd})$ | 09/05<br>$\text{m}^3\text{s}^{-1}(\text{mgd})$ |                        |                                                                         |
| 1        | 0.657 (15.0)                                   | 0.508 (11.6)                                   | 0.499 (11.4)                                   | AS                     | filtration, chlorination/dechlorination                                 |
| 2        | 0.618 (14.1)                                   | 0.565 (12.9)                                   | 0.578 (13.2)                                   | AS                     | nitrifying activated sludge, filtration,<br>chlorination/dechlorination |
| 3        | 2.47 (56.5)                                    | 2.26 (51.5)                                    | 1.93 (44.0)                                    | AS                     | denitrification, filtration,<br>chlorination/dechlorination             |
| 4        | 5.30 (121)                                     | 4.84 (111)                                     | 4.77 (109)                                     | AS                     | filtration, chlorination/dechlorination                                 |
| 5        | 6.11 (139)                                     | 5.99 (137)                                     | 5.48 (125)                                     | AS                     | filtration, chlorination/dechlorination                                 |
| 6        | 5.97 (136)                                     | 5.32 (121)                                     | 5.90 (135)                                     | AS /TF                 | filtration, chlorination/dechlorination                                 |

Abbreviations: mgd = megagallons/day; AS = activated sludge; TF = trickling filter

**Table SI 2a. Concentration of WWDCs measured in wastewater effluent samples during March 21-30, 2005.**

| WWTP                          | 1          | 2          | 3          | 4          | 5          | 6          | Spike Recoveries (%) |
|-------------------------------|------------|------------|------------|------------|------------|------------|----------------------|
| Dates Collected <sup>a</sup>  | 3/23-24/05 | 3/28-29/05 | 3/21-22/05 | 3/29-30/05 | 3/23-24/05 | 3/29-30/05 |                      |
| Hormones (ng/L)               |            |            |            |            |            |            |                      |
| 17a-Estradiol                 | <0.1       | <0.1       | <0.1       | <0.1       | <0.1       | <0.1       | n/a                  |
| 17b-Estradiol                 | <0.1       | <0.1       | <0.1       | <0.1       | <0.1       | 1.6        | n/a                  |
| Estrone                       | <0.1       | <0.1       | 0.5        | <0.1       | <0.1       | 3          | n/a                  |
| Estriol                       | <0.1       | <0.1       | <0.1       | <0.1       | <0.1       | <0.1       | n/a                  |
| Testosterone                  | <0.1       | <0.1       | <0.1       | <0.1       | <0.1       | <0.1       | n/a                  |
| Androstenedione               | <0.1       | <0.1       | <0.1       | <0.1       | <0.1       | <0.1       | n/a                  |
| Progesterone                  | <0.1       | <0.1       | <0.1       | <0.1       | <0.1       | <0.1       | n/a                  |
| MedroxyProg.                  | <0.1       | <0.1       | <0.1       | <0.1       | <0.1       | <0.1       | n/a                  |
| Beta Blockers (ng/L)          |            |            |            |            |            |            |                      |
| metoprolol                    | 257        | 306        | 169        | 440        | 12         | 343        | 95                   |
| propranolol                   | 3          | 9          | 24         | 7          | <1         | 22         | 55                   |
| Acidic Pharmaceuticals (ng/L) |            |            |            |            |            |            |                      |
| diclofenac                    | 25         | <3         | 6          | 10         | <3         | <3         | 78                   |
| gemfibrozil                   | <3         | 14         | 31         | 22         | <3         | 9          | 93                   |
| ibuprofen                     | 12         | <3         | <3         | 149        | <3         | 11         | 80                   |
| indometacine                  | 25         | 11         | 9          | 29         | 6          | 8          | 47                   |
| naproxen                      | 41         | 7          | 72         | 67         | <3         | 9          | 94                   |
| ketoprofen                    | 8          | <3         | 4          | 7          | <3         | 3          | 54                   |
| Organic Iodide (ug/L)         | 5          | 6          | 8          | 13         | 9          | 8          | 74                   |
| Total EDTA (nM)               | 493        | 142        | 264        | 229        | 292        | 173        |                      |
| FeEDTA (nM)                   | 248        | 104        | 196        | 207        | 165        | 183        |                      |
| spike recoveries (%) (FeEDTA) | 43         | 105        | 77         | 84         | 93         | 93         |                      |

n.b.: duplicates are expressed in parentheses

n/a : spike recoveries were not performed for these analyses

**Table SI 2b. Concentration of WWDCs measured in wastewater effluent samples during July 19-20, 2005.**

| Sample                           | 1       | 2       | 3         | 4       | 5       | 6       | Spike Recoveries (%) |
|----------------------------------|---------|---------|-----------|---------|---------|---------|----------------------|
| Dates Collected <sup>a</sup>     | 7/19/05 | 7/19/05 | 7/19/05   | 7/19/05 | 7/19/05 | 7/19/05 |                      |
|                                  |         |         |           |         |         |         |                      |
| Hormones (ng/L)                  |         |         |           |         |         |         |                      |
| 17a-Estradiol                    | <0.1    | <0.1    | <0.1      | <0.1    | <0.1    | <0.1    | 138                  |
| 17b-Estradiol                    | <0.1    | <0.1    | <0.1      | <0.1    | <0.1    | <0.1    | 147                  |
| Estrone                          | <0.1    | <0.1    | 1         | <0.1    | <0.1    | <0.1    | 9.1                  |
| Estriol                          | <0.1    | <0.1    | <0.1      | <0.1    | <0.1    | <0.1    | 134                  |
| Testosterone                     | <0.1    | <0.1    | <0.1      | <0.1    | <0.1    | <0.1    | 122                  |
| Androstenedione                  | <0.1    | <0.1    | <0.1      | <0.1    | <0.1    | <0.1    | 85                   |
| Progesterone                     | <0.1    | <0.1    | <0.1      | <0.1    | <0.1    | <0.1    | 134                  |
| MedroxyProg.                     | <0.1    | <0.1    | <0.1      | <0.1    | <0.1    | <0.1    | 175                  |
|                                  |         |         |           |         |         |         |                      |
| Beta Blockers (ng/L)             |         |         |           |         |         |         |                      |
| metoprolol                       | 130     | 176     | 109 (130) | 199     | <1      | 5       | 48                   |
| propranolol                      | <1      | 2       | <1        | 3       | <1      | 1       | 54                   |
|                                  |         |         |           |         |         |         |                      |
| Acidic Pharmaceuticals<br>(ng/L) |         |         |           |         |         |         |                      |
| diclofenac                       | 33      | <10     | n/a       | <10     | <10     | <10     | <10                  |
| gemfibrozil                      | 49      | 234     | n/a       | 29 (23) | 57      | 18      | <10                  |
| ibuprofen                        | 41      | 28      | n/a       | 20 (19) | 31      | 13      | <10                  |
| indometacine                     | 26      | 14      | n/a       | 17 (18) | 14      | 14      | <10                  |
| naproxen                         | 30      | 46      | n/a       | 21 (22) | 63      | 22      | 20                   |
| ketoprofen                       | 29      | <10     | n/a       | 31 (21) | <10     | <10     | 51                   |
|                                  |         |         |           |         |         |         |                      |
| Organic Iodide (ug/L)            | 5.7     | 6.4     | 8.4       | 12      | 11.2    |         | 69                   |
|                                  |         |         |           |         |         |         |                      |
| Total EDTA (nM)                  | 1197    | 426     | 730       | 598     | 651     | 833     | 111                  |
| FeEDTA (nM)                      | 364     | 198     | 623       | 341     | 406     | 635     |                      |
|                                  |         |         |           |         |         |         |                      |

n.b.: duplicates are expressed in parentheses

n/a = sample was destroyed during processing

**Table SI 2c. Concentration of WWDCs measured in wastewater effluent samples during September 14-15, 2005.**

| Sample                        | 1         | 2       | 3       | 4       | 5       | 6          | Spike Recovery (%) | Flow-weighted average concentration |
|-------------------------------|-----------|---------|---------|---------|---------|------------|--------------------|-------------------------------------|
| Dates Collected               | 9/14/05   | 9/14/05 | 9/14/05 | 9/14/05 | 9/14/05 | 9/14/05    | Lab                |                                     |
|                               |           |         |         |         |         |            |                    |                                     |
| Beta Blockers (ng/L)          |           |         |         |         |         |            |                    |                                     |
| metoprolol                    | 2269      | 1539    | 636     | 921     | 1132    | 964 (1203) | 73                 | 1070                                |
| propranolol                   | 124       | 47      | <10     | <10     | 200     | 92 (113)   | 75                 | 93                                  |
|                               |           |         |         |         |         |            |                    |                                     |
| Acidic Pharmaceuticals (ng/L) |           |         |         |         |         |            |                    |                                     |
| diclofenac                    | <10       | <10     | <10     | <10     | <10     | 26         | 81                 | 8.0                                 |
| gemfibrozil                   | 34        | 52 (56) | 12      | 97      | 27      | 55         | 117                | 52                                  |
| ibuprofen                     | 60        | 42 (37) | 11      | 59      | <10     | 403        | 168                | 142                                 |
| indometacine                  | 8         | 10 (17) | <2      | 15      | <2      | <2         | 48                 | 4.4                                 |
| naproxen                      | 38        | 8 (11)  | 29      | 90      | 49      | 223        | 97                 | 109                                 |
| ketoprofen                    | <10       | <10     | <10     | <10     | <10     | <10        | 107                | <10                                 |
|                               |           |         |         |         |         |            |                    |                                     |
| Organic Iodide (ug/L)         | 5.9 (5.0) | 11.7    | 8.1     | 11.3    | 8.3     | 13         | 76                 | 10.5                                |
|                               |           |         |         |         |         |            |                    |                                     |
| Total EDTA (nM)               | 1640      | 540     | 454     | 816     | 677     | 1641       | 92                 | 1010                                |
| FeEDTA (nM)                   | 723       | 268     | 344     | 538     | 466     | 1574       |                    | 814                                 |

n.b.: duplicates are expressed in parentheses

**Table SI 3. Concentrations of WWDCs measured in September in the Trinity River.**

| Site                          | 1         |         |         |           | 2           |         |         |         | 3       |         |         |         |
|-------------------------------|-----------|---------|---------|-----------|-------------|---------|---------|---------|---------|---------|---------|---------|
| Dates Collected <sup>a</sup>  | 9/12/04   | 9/13/05 | 9/14/05 | 9/15/05   | 9/12/04     | 9/13/05 | 9/14/05 | 9/15/05 | 9/12/04 | 9/13/05 | 9/14/05 | 9/15/05 |
| Beta Blockers (ng/L)          |           |         |         |           |             |         |         |         |         |         |         |         |
| metoprolol                    | 228       | 571     | 439     | 344 (382) | 268         | 326     | n/a     | 376     | 136     | 131     | 220     | 219     |
| propranolol                   | 16        | 50      | 52      | 24        | 17          | <10     | <10     | 74      | <10     | <10     | <10     | <10     |
|                               |           |         |         |           |             |         |         |         |         |         |         |         |
| Acidic Pharmaceuticals (ng/L) |           |         |         |           |             |         |         |         |         |         |         |         |
| diclofenac                    | <10 (<10) | <10     | <10     | <10       | <10         | <10     | n/a     | <10     | <10     | <10     | <10     | <10     |
| gemfibrozil                   | 65 (63)   | 71      | 67      | 50        | 79          | 49      | n/a     | 41      | 49      | 55      | 51      | 57      |
| ibuprofen                     | 64 (56)   | 74      | 55      | 30        | 76          | 32      | n/a     | 26      | 28      | 21      | 18      | 39      |
| indometacine                  | 10 (<5)   | <5      | 11      | 48        | <5          | 20      | n/a     | <5      | <5      | <5      | <5      | 21      |
| naproxen                      | 32 (29)   | 58      | 30      | 32        | 10          | 24      | n/a     | 14      | 8       | 11      | 12      | 24      |
| ketoprofen                    | <10 (<10) | <10     | <10     | <10       | <10         | <10     | n/a     | <10     | <10     | <10     | <10     | <10     |
|                               |           |         |         |           |             |         |         |         |         |         |         |         |
| Organic Iodide (ug/L)         | 10.6      | 13.4    | 15.6    | 11.4      | 11.2 (10.5) | 9.4     | 10.4    | n/a     | 7.7     | 11.4    | 11.8    | 11.9    |
|                               |           |         |         |           |             |         |         | n/a     |         |         |         |         |
| Total EDTA (nM)               | 240       | 327     | 277     | 243       | 220         | 196     | 190     | 216     | 150     | n/a     | 145     | 152     |
| FeEDTA (nM)                   | 23        | 35      | 46      | 57        | 31          | 33      | 47      | 47      | 34      | n/a     | 54      | 37      |

| Sample                        | 4       |         |         |         | 5       |         |         |         | Upstrm  | Spike Recovery % |             |
|-------------------------------|---------|---------|---------|---------|---------|---------|---------|---------|---------|------------------|-------------|
| Dates Collected <sup>a</sup>  | 9/12/05 | 9/13/05 | 9/14/05 | 9/15/05 | 9/12/05 | 9/13/05 | 9/14/05 | 9/15/05 | 9/12/05 | 9/13/05          | Field Spike |
| Beta Blockers (ng/L)          |         |         |         |         |         |         |         |         |         |                  |             |
| metoprolol                    | 77      | 99      | 122     | 124     | 50      | 82      | 41      | 82      | <10     | <10              | 89          |
| propranolol                   | <10     | <10     | 37      | 35      | <10     | <10     | 25      | 57      | <10     | <10              | 79          |
|                               |         |         |         |         |         |         |         |         |         |                  |             |
| Acidic Pharmaceuticals (ng/L) |         |         |         |         |         |         |         |         |         |                  |             |
| diclofenac                    | <10     | <10     | <10     | <10     | <10     | <10     | <10     | <10     | <10     | <10              | 54          |
| gemfibrozil                   | 20      | 37      | 37      | 32      | 20      | 17      | 14      | 11      | nd      | nd               | 91          |
| ibuprofen                     | 8       | 10      | <5      | 23      | 8       | 5       | <5      | 6       | <5      | <5               | 119         |
| indometacine                  | <5      | <5      | <5      | <5      | <5      | <5      | <5      | <5      | <5      | <5               | 54          |
| naproxen                      | 4       | 9       | 1       | 13      | 4       | 6       | <1      | 5       | <1      | <1               | 76          |
| ketoprofen                    | <10     | <10     | <10     | <10     | <10     | <10     | <10     | <10     | <10     | <10              | 67          |
|                               |         |         |         |         |         |         |         |         |         |                  |             |
| Organic Iodide (ug/L)         | 10.5    | 17.4    | 9.9     | 11.2    | 9.8     | 9.6     | 11.1    | 6.6     | 4.1     | 3.3              | 82          |
|                               |         |         |         |         |         |         |         |         |         |                  |             |
| Total EDTA (nM)               | 124     | 90      | 79      | 104     | 69      | 543     | 437     | 71      | <35     | <35              | 96          |
| FeEDTA (nM)                   | <35     | 9       | <35     | 13      | 15      | 357     | 345     | <35     | <35     | <35              |             |

n.b.: duplicates are expressed in parentheses

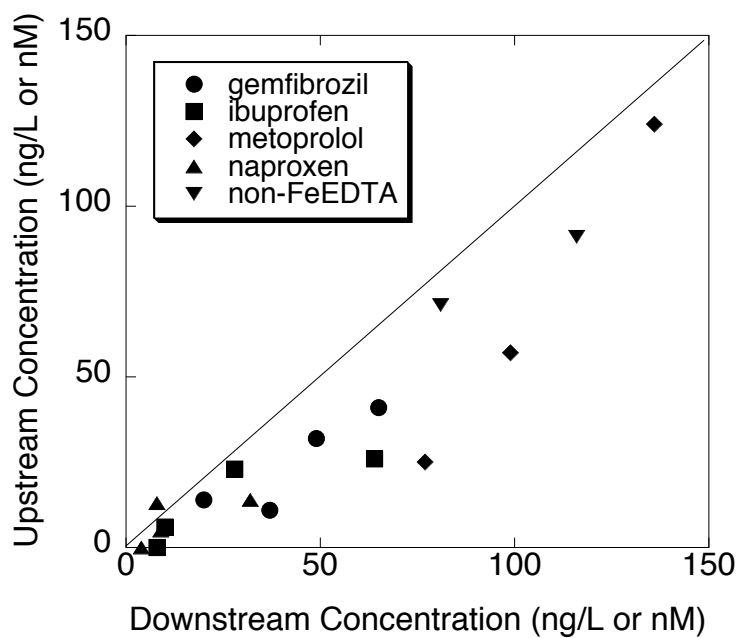

**Figure SI 1.** A comparison of concentrations of reactive compounds upstream and samples from the Trinity River. Upstream and downstream pairs were defined on the basis of the estimated hydraulic transit time between sampling sites.

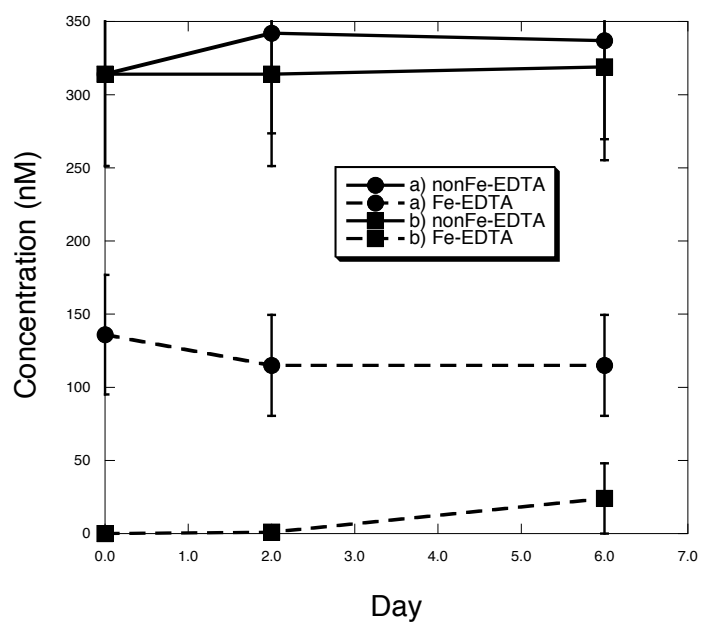

**Figure SI 2.** Speciation of EDTA with initial concentration of  $460 \pm 20$  during incubation of mixed Trinity River/WWTP effluent samples. a) Experiment immediately put in the dark; b) Experiment initially irradiated to remove FeEDTA.



a)

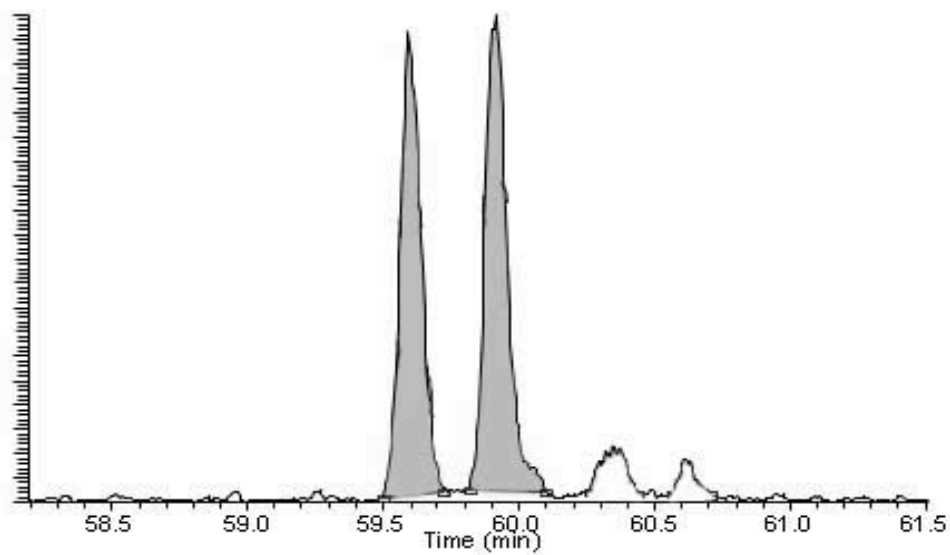

b)

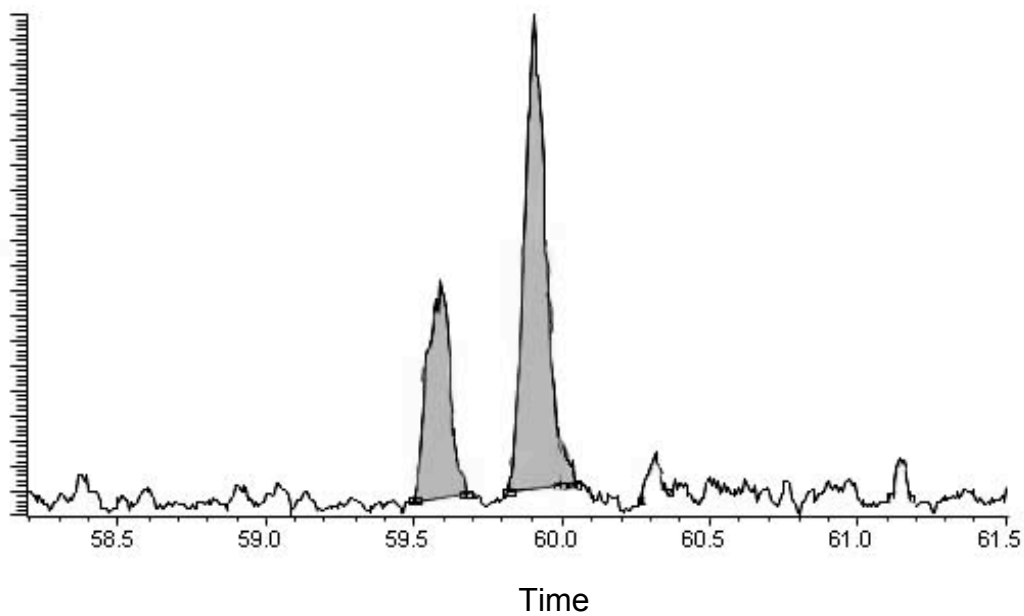

**Figure SI 3.** Chromatograms of the enantiomers of metoprolol from a) WWTP 2 on Sept 14, 2005 (EF= 0.48) and b) furthest downstream Trinity River sampling site, site 5, on Sept 13,2005 (EF = 0.32)

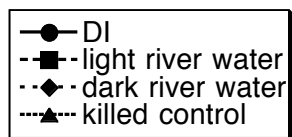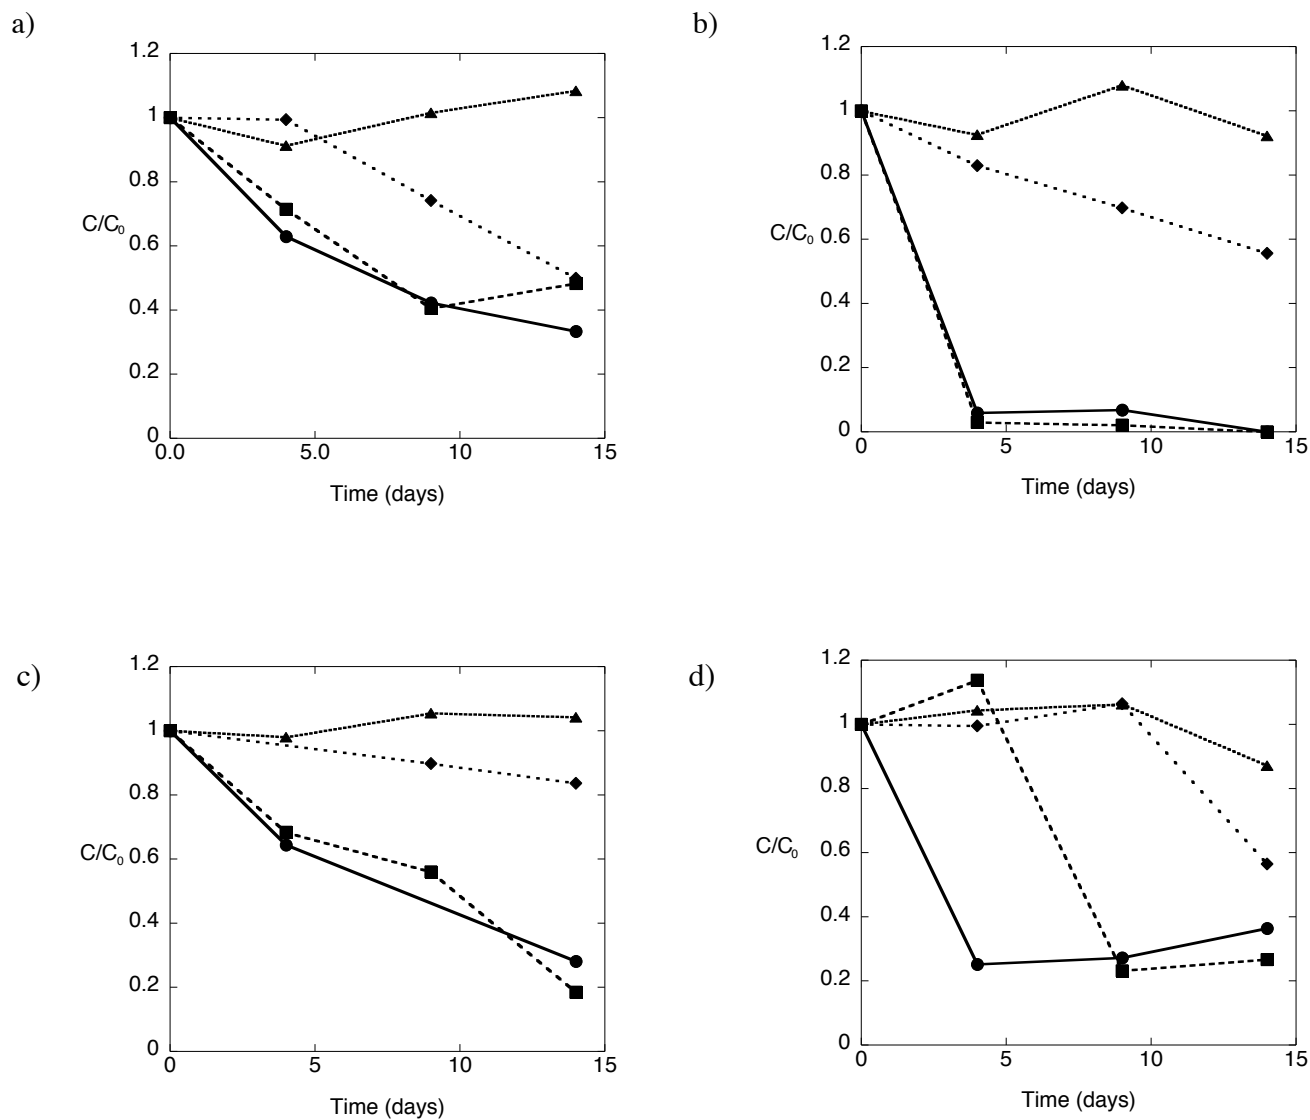

**Figure SI 4.** Microcosm experiments for a) gemfibrozil; b) naproxen; c) metoprolol and d) ibuprofen. Initial concentrations were 1  $\mu\text{g/L}$  for each compound. DI refers to deionized water control.

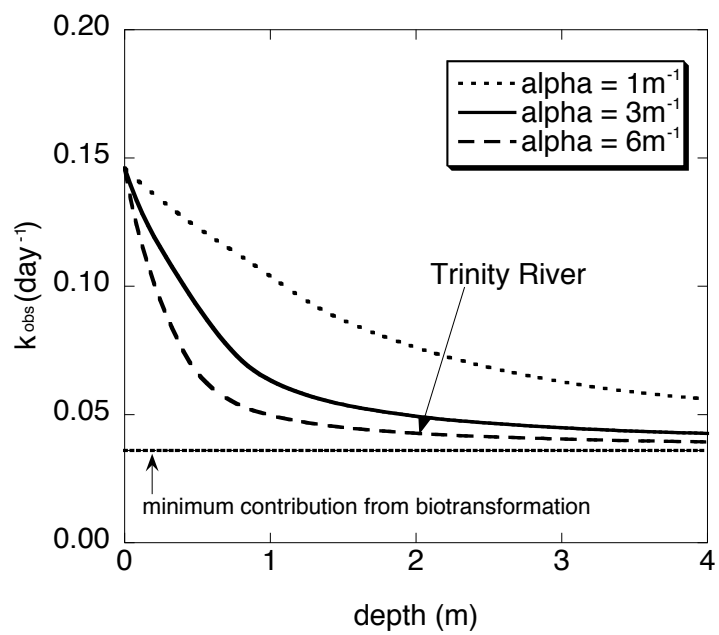

**Figure SI 5.** Calculated attenuation rates for ibuprofen for mid-September, 33°N.

## SI Acidic Pharmaceutical Method

The following method is similar to that published by Oellers et al. for determining concentrations of acidic pharmaceuticals (1).

After filtration of the samples, flurbiprofen (Sigma) was added as a surrogate standard at a final concentration of 500 ng/L. The sample pH was adjusted to less than 2 with concentrated hydrochloric acid. The sample was placed in a silanized glass container connected to the extraction columns with Teflon tubing. The silanized glass extraction columns were packed with 500 mg of ENVI-18 solid phase extraction resin (Supelco) that was rinsed with 10 mL HPLC grade methanol (Fisher Scientific) and 20 mL Nanopure water prior to extraction. The samples were passed through the extraction columns at a flow rate of approximately 10 mL/min by connecting the tubing to a peristaltic pump placed downstream of the extraction column. After passing the sample through the columns, they were rinsed with 20 mL nanopure water and then dried for 10 minutes by pumping air through the resins at the same flow rate.

Following solid phase extraction, the samples were eluted from the resins using 10 mL of HPLC grade methanol (Fisher Scientific). The methanolic extracts were collected in silanized glass test tubes. The extracts then were dried completely by placing them in a vacuum oven at room temperature overnight. Following the drying step, the samples were resuspended in 2 mL of HPLC grade methanol and transferred to 4 mL glass vials. The extracts then were blown to dryness under a gentle stream of high purity nitrogen over a period of approximately 30 minutes. Following blowdown, the samples were derivatized with a diazomethane/diethylether mixture, prepared as described by the manufacturer (Aldrich Chemical Company, Technical Bulletin A1-180). Diazomethane presents some potential safety hazards (e.g., it is a mutagen and can explode upon impact) and should be handled with great care (see Aldrich Chemical Company, Technical Bulletin A1-180 for details). After adding 250  $\mu$ L of diazomethane/diethyl ether, the extracts were allowed to react for 2 minutes prior to quenching the excess diazomethane with 10  $\mu$ L of a 1:10 acetic acid/acetone mixture. The derivatized samples were again blown to near dryness under a stream of high purity nitrogen and resuspended in 200  $\mu$ L of isooctane with 500 mg/L of hexachlorobenzene as an internal standard.

The derivatized acidic drugs were analyzed by GC/MS/MS using a Finnegan GCQ GC/MS/MS system with a 30-meter DB-5 column. Prior to analysis the GC/MS/MS system was optimized by changing the injection port liner, cutting back the first 2-cm of the column when necessary, and cleaning the ion trap, when necessary. The analysis of wastewater extracts led to a decrease in system performance, and it was usually necessary to repeat the cleaning procedure after approximately 200 injections. The analytical conditions used for quantification are listed in Table 1 and the following conditions were used for the oven and mass spectrometer: isothermal at 50°C for 4 min, 20 °C/min to 120°C, 2°C/min to 180 °C, and finally 30°C/min to 290 °C, where it was held for 8 min. The carrier gas used was helium at a flow rate of 1.2 mL/min. Splitless injection of 2  $\mu$ L samples was used with a split flow of 50 mL/min and an injection port temperature of 270 °C. The mass spectrometer had a source temp of 200 °C and the transfer line was held at 300°C.

**Table SI 4. Conditions used for analysis of acidic drugs.**

| Compound          | Retention<br>time<br>(min) | Parent ion     | Product ion | Voltage (V) |
|-------------------|----------------------------|----------------|-------------|-------------|
| Ibuprofen         | 19.2                       | 161            | 105, 119    | 0.75        |
| Gemfibrozil       | 32.8                       | 143            | 83          | 0.75        |
| Flurbiprofen      | 38.5                       | 258            | 199         | 1.0         |
| Naproxen          | 41.0                       | 244            | 170, 185    | 0.75        |
| Ketoprofen        | 46.3                       | 209            | 105         | 0.50        |
| Diclofenac        | 48.7                       | 214            | 151, 178    | 0.75        |
| Indometacine      | 58.5                       | 371            | 139, 312    | 1.0         |
| Hexachlorobenzene | 25.8                       | 142, 249, 284* |             |             |

\*Hexachlorobenzene, the internal standard, was quantified by SIM.

Prior to analysis of samples two standard curves were constructed using a mixed standard of the suite of acidic drugs. The standard curve contained 37.5 µg/L, 75 µg/L, 150 µg/L, 225 µg/L and 300 , 600 µg/L, 900 µg/L and 1200 µg/L. A linear calibration curve was calculated from simple linear regression. Following calibration, a run sequence was used consisting of five standards followed by a randomized mixture of the samples and QA/QC samples. The calibration curve was checked every fifteen samples by running a blank and a reslope standard from the middle of the calibration curve. If the calibration standard disagreed with the standard curve by more than 25% the samples in the following section were rerun.

For the acidic drugs, the target for recoveries was 60-120%, as determined by recovery of flurbiprofen. For good recoveries, the concentrations were corrected for losses in extraction and derivitization. Typical detection limits for acidic drugs in wastewater effluent were around 10 ng/L. These compounds were not detected in blanks.

## SI Calculations

a. *Ratio of day-averaged surface solar intensities L(330nm) in Berkeley, CA (October) to the Trinity River (September), neglecting cloud cover, estimated from Appendix Table A-7 and A-8, Leifer (1988) (2):*

$$\begin{aligned}\text{Berkeley: } L(330\text{nm}) &\cong 8.7 \times 10^{-2} \text{ millieinsteins cm}^{-2}\text{day}^{-1} \\ \text{Trinity River (TR): } L(330\text{nm}) &\cong 9.3 \times 10^{-2} \text{ millieinsteins cm}^{-2}\text{day}^{-1}\end{aligned}$$

$$\text{Ratio : } L_{\text{berkeley}}/L_{\text{TR}} = (8.7 \times 10^{-2})/(9.3 \times 10^{-2}) = 0.94$$

b. *Depth of photic zone in Trinity River*

The photic zone is defined as follows:  
Transmittance (T)=I/I<sub>0</sub>= 0.05 (I=Intensity)  
Absorption(A) = -log(T) = 1.30

$$\begin{aligned}A_{330\text{nm}} &= \alpha_{330} z_{\text{photic}} \quad (\alpha_{330}=0.06\text{cm}^{-1}; \text{ the average measured from all Trinity River samples}) \\ z_{\text{photic}} &= A/\alpha_{330} = 1.30/0.06\text{cm}^{-1} = 22 \text{ cm}\end{aligned}$$

Ratio of photic zone to total depth, assuming a mean depth of 2 m in the Trinity River:

$$z_{\text{photic}}/z_{\text{tot}} = 0.22\text{m}/2\text{m} = 0.11$$

c. *Comparison of photodegradation rates in sunlit river water micocosm and in situ, Trinity River*

k<sub>surf</sub> ≡ surface photodegradation rate constant in Dallas, TX, in September.

S ≡ Screening factor to account for absorption by DOM

α ≡ beam attenuation coefficient (6 m<sup>-1</sup> for Trinity River water at 330 nm)

z ≡ depth of photic zone (0.13 m for microcosm, 0.22 m for Trinity River)

$$\begin{aligned}\text{Microcosm: } k_{\text{surf}}(L_{\text{berk}}/L_{\text{TR}})*S & \quad [S = (1-e^{-\alpha z})/\alpha z = (1-e^{-6 \times 0.13})/(6 \times 0.13) = 0.69] \\ &= k_{\text{surf}} (0.94)(0.69) \\ &= 0.65k_{\text{surf}}\end{aligned}$$

$$\begin{aligned}\text{River In Situ: } k_{\text{surf}} (z_{\text{photic}}/z_{\text{tot}})*S & \quad [S = (1-e^{-\alpha z})/\alpha z = (1-e^{-6 \times 0.22})/(6 \times 0.22) = 0.55] \\ &= k_{\text{surf}} (0.11)(0.55) \\ &= 0.061k_{\text{surf}}\end{aligned}$$

Ratio of photodegradation rates in the microcosm (k<sub>micro</sub>) and the Trinity River (k<sub>TR</sub>):

$$k_{\text{micro}}/k_{\text{TR}} = 0.65 k_{\text{surf}}/0.061 k_{\text{surf}} = 11$$

*d. Calculated EF of metoprolol on day 14 of light nonsterile microcosm experiment*

Using data from figure 3 for the field data:

$$\Delta EF/(1-C/C_0) \text{ in river at last sampling point} = (0.50-0.315)/(1-54/1418) = 0.19$$

$$\Delta EF_{\text{microfinal}} = 0.19 \times (1-C/C_0) \text{ in microcosm} = 0.19 \times (1 - 0.84) = 0.03 \quad \text{Ratio : 0.94}$$

*e. Calculations for attenuation of naproxen used in Figure 7.*

muddy river  $\alpha_{330\text{nm}} = 6\text{m}^{-1}$  (measured in Trinity River water)

medium river  $\alpha_{330\text{nm}} = 3\text{m}^{-1}$  (estimated) (3)

clear river  $\alpha_{330\text{nm}} = 1\text{m}^{-1}$  (estimated)

photolysis rate from deionized water microcosm treatment =  $0.37\text{ d}^{-1}$

adjusted for latitude/season  $k_{\text{tex}} = k_{\text{berk}}/\text{ratio} = 0.37/0.94 = 0.39\text{ d}^{-1}$

adjusted to surface intensity (instead of average over 13 cm microcosm depth)

then, for each river,  $k_{\text{surf}}$  is multiplied by S, where

$$k_{\text{photo}}(z) = S(z)k_{\text{surf}}; \text{ for } z_{\text{tot}} < z_{\text{photic}}$$

and

$$k_{\text{photo}}(z) = (z_{\text{photic}}/z) \times S(z_{\text{photic}}) \times k_{\text{surf}}; \text{ for } z_{\text{tot}} > z_{\text{photic}}$$

finally, for overall rate  $k_{\text{tot}}$ , expressed on y-axis of Figure 7,

$$k_{\text{obs}} = k_{\text{photo}} + k_{\text{bio}}$$

where the biodegradation rate,  $k_{\text{bio}} = 0.041\text{ d}^{-1}$

## References

- (1) Ollers, S.; Singer, H. P.; Fassler, P.; Muller, S. R., Simultaneous quantification of neutral and acidic pharmaceuticals and pesticides at the low-ng/l level in surface and waste water. *Journal of Chromatography A* 2001, 911, 225-234.
- (2) Leifer, A. *The Kinetics of Environmental Aquatic Photochemistry*; American Chemical Society: USA, 1988.
- (3) Schwarzenbach, R.; Gshwend, P.; Imboden, D. Chapter 13: Photochemical Transformation Reactions. In *Environmental Organic Chemistry*; John Wiley & Sons, Inc.: New York, 1993; pp 436-484.
